# Supplementary material for: Enhancing the single-molecule magnetic performance of β-diketonate Dy(iii) complexes by modulating the coordination microenvironment and magnetic interaction: from a mononuclear to a dinuclear structure
Source: Royal Society of Chemistry journal article supplement (doi:10.1039/d4dt02179g), 2024-01-01
Supplement: d4dt02179g1.pdf [file d4dt02179g1.pdf]

## Supporting Information

### Enhancing the single-molecule magnet performance of $\beta$ -diketonate Dy(III) complexes by modulating the coordination microenvironment and magnetic interaction: from mononuclear to dinuclear structure

Yafu Wang,<sup>a#</sup> Zhaopeng Zeng,<sup>a, c#</sup> Shuchang Luo,<sup>\*b</sup> Yan Guo<sup>a</sup> and Xiangyu Liu<sup>\*a</sup>

<sup>a</sup>State Key Laboratory of High-Efficiency Utilization of Coal and Green Chemical Engineering, College of Chemistry and Chemical Engineering, Ningxia University, Yinchuan 750021, China.

<sup>b</sup>College of Chemical Engineering, Guizhou University of Engineering Science, Bijie 551700, China.

<sup>c</sup>Xinhua College of Ningxia University, Yinchuan 750021, China.

# These authors contributed equally to this work.

**\*Corresponding author**

**Prof. Xiangyu Liu**

**E-mail: xiangyuli432@126.com**

**Dr. Shuchang Luo**

**Email: luosc@gues.edu.cn**

## Contents

### 1. *Ab initio* calculational details

### 2. Electronic structure calculations

### 3. Evaluation of the exchange interactions

**Table S1.** Crystal data and structure refinement details for complexes **1-3**.

**Table S2.** Selected bond lengths (Å) and bond angles (°) for **1-3**.

**Table S3.** Continuous Shape Measurements (CShMs) for Dy(III) ions in **1** and **2** by SHAPE 2.1.

**Table S4.** Relaxation fitting parameters from least-squares fitting of  $\chi(f)$  data under 0 Oe dc field of **2**.

**Table S5.** Relaxation fitting parameters from least-squares fitting of  $\chi(f)$  data under 0 Oe dc field of **1@Y**.

**Table S6.** Calculated energy levels ( $\text{cm}^{-1}$ ) and  $g$  ( $g_x, g_y, g_z$ ) tensors and  $\tau_{\text{QTM}}$  ( $^{-1}/\text{s}$ ) of the lowest eight Kramers doublets (KDs) of **1**, **2a** and **2b** using CASSCF/RASSI-SO with OpenMolcas.

**Table S7.** Wave functions with definite projection of the total moment  $|m_j\rangle$  for the lowest eight KDs of **1**, **2a** and **2b** using CASSCF/RASSI-SO with OpenMolcas.

**Table S8.** Mulliken atomic charge on the metal atoms and donor atoms in the ground state of complexes **1**, **2a** and **2b** calculated within CASSCF.

**Table S9.** Calculated crystal field parameters  $B(k, q)$  for **1**, **2a** and **2b** using SCF/RASSI-SO with OpenMolcas.

**Fig. S1** Crystal packing diagram for complex **1**, the dashed line represents the interaction.

**Fig. S2** Crystal packing diagram for complex **2**, the dashed line represents the interaction.

**Fig. S3** PXRD curves of **1**, **3**, **1@Y** (a) and **2** (b).

**Fig. S4** Plots of  $M$  vs  $H/T$  for **1** (a) and **2** (b) at different temperatures.

**Fig. S5** Ac magnetic susceptibility measurements for **1** (a) in zero static field. Frequency dependence of  $\chi''_{\text{M}}$  susceptibilities for **1** (b) under different dc fields.

**Fig. S6** Temperature dependence of the  $\chi'_{\text{M}}$  (a) and  $\chi''_{\text{M}}$  (b) ac susceptibilities for complex **2** at different frequencies under zero static field.

**Fig. S7** Frequency dependence of the  $\chi'_{\text{M}}$  ac susceptibilities for **1@Y** under zero static field.

**Fig. S8** Mulliken spin density of complexes **1** (a), **2a** (b) and **2b** (c) (magenta for  $\alpha$  spin, green for  $\beta$  spin, isovalue = 0.02).

### References

### 1. *Ab initio* calculational details

The SA-CASSCF/RASSI-SO methodology for complexes **1**, **2a** and **2b** were performed in OpenMolcas software [1] based on the crystal structures obtained from experimental X-ray structures. The calculated data were visualized with the VMD 1.9.3 program [2]. Due to the limitations of our hardware, the calculations were performed with the Dy atoms in the ANO-RCC-VTZP basis set, the O and N atoms in the ANO-RCC-VTZ basis sets, and the other atoms in the ANO-RCC-MB basis sets [3]. The relativistic effect uses the DKH2 Hamiltonian function include 9 electrons in the 7 4f orbitals [4]. All 21 sextet, 224 quartet and 490 doublet states were considered in three separate calculations. The SOC operator is composed of 21 sextet, 128 quartet and 130 doublet states.

### 2. Electronic structure calculations

To further understand the slow relaxation mechanism for **1**, **2a** and **2b**, *ab initio* calculations were performed under SA-CASSCF/RASSI-SO/SINGLE\_ANISO module by OpenMolcas program [1]. The calculations show that the **1**, **2a** and **2b** Kramers double states (KDs) have large differences with energies of 4166.751 cm<sup>-1</sup> (**1**), 594.822 cm<sup>-1</sup> (**2a**) and 594.729 cm<sup>-1</sup> (**2b**) (Table S6). **2a** and **2b** have similar coordination environments and their calculated energy barriers are almost the same.

### 3. Evaluation of the exchange interactions

To evaluate the magnetic interactions of the complex **2**, we calculate their coupling constants in three steps. First, the model complexes **2a** and **2b** were obtained by replacing one of the Dy(III) ion of the binuclear complexes with the antimagnetic Lu(III) ion, and the corresponding magnetic data were calculated by SA-CASSCF/RASSI-SO/SINGLE\_ANISO method. Second, the Dy(III) ( $S = 5/2$ ) ion was replaced with the isotropic Gd(III) ( $S = 7/2$ ) ion to obtain the dinuclear Gd(III) complexes, and based on the broken symmetry DFT method using ORCA 5.0.3 software [5-7], the energies were calculated broken symmetry state ( $M_s = 0$ ) and the high-spin state ( $M_s = 7$ ) at the B3LYP/DKH2-def2-SVP level of theory (the SARC2-DKH-QZVP basis sets for Gd atoms) (it's Hamiltonian operator and magnetic coupling constant calculations can be expressed in Eq. (1-3)) [8], and the exchange coupling constant  $J_{\text{exchange,Gd-Gd}}$  is obtained by using Eq. (2). The second-order Douglas-Kroll-Hess relativistic effect is considered [9,10]. The exchange coupling constants  $J_{\text{exchange,Dy-Dy}}$  for the dinuclear Dy complexes are further calculated by using Eq. (3) [11].

$$\hat{H} = -J_{\text{exchange,Gd-Gd}} \hat{S}_{Gd1} \cdot \hat{S}_{Gd2} \quad (1)$$

$$J_{\text{exchange,Gd-Gd}} = \frac{8(E_{BS} - E_{HS})}{49} \quad (2)$$

$$J_{\text{exchange,Dy-Dy}} = \frac{(7/2)^2}{(5/2)^2} J_{\text{exchange,Gd-Gd}} = \frac{49}{25} J_{\text{exchange,Gd-Gd}} \quad (3)$$

Here,  $E_{BS}$  and  $E_{HS}$  denote the energies of the symmetry-broken and high-spin states, respectively.

Finally, based on the Lines model, the dipolar-dipolar magnetic coupling constants ( $J_{\text{dipolar}}$ ) and total magnetic coupling constants ( $J_{\text{total}}$ ) of the binuclear complex **2** are calculated by equation (4-6), and the results are shown in Table 1 [10].

$$\hat{H} = -J_{\text{total}} \hat{S}_{Dy1} \cdot \hat{S}_{Dy2} \quad (4)$$

$$J_{\text{total}} = J_{\text{dipolar}} + J_{\text{exchange,Dy-Dy}} \quad (5)$$

$$J_{\text{dipolar}} = -\frac{\mu_B^2 g_{1z} g_{2z}}{r^3} (\cos \theta - 3 \cos \phi_1 \cos \phi_2) \quad (6)$$

where  $\theta$  is the angle between the ground magnetic axes of the two Dy(III) ions,  $\phi_1$  and  $\phi_2$  denote the angle between the ground magnetic axes of Dy1, Dy2 and the Dy-Dy line, respectively. the values of  $g_{1z}$  and  $g_{2z}$  are  $g_z$  for the ground doublet states of Dy1, Dy2, respectively, and  $r$  is the distance between the two Dy ions,  $\mu_B^2 = 0.43297$  cm<sup>-1</sup>/T.

**Table S1.** Crystal data and structure refinement details for complexes **1-3**.

| complex                                                                              | 1                                                               | 2                                                               | 3                                                               |
|--------------------------------------------------------------------------------------|-----------------------------------------------------------------|-----------------------------------------------------------------|-----------------------------------------------------------------|
| Empirical formula                                                                    | C <sub>49</sub> H <sub>53</sub> DyN <sub>2</sub> O <sub>6</sub> | C <sub>43</sub> H <sub>48</sub> DyN <sub>2</sub> O <sub>6</sub> | C <sub>49</sub> H <sub>53</sub> YN <sub>2</sub> O <sub>6</sub>  |
| Formula weight                                                                       | 928.43                                                          | 851.33                                                          | 854.84                                                          |
| Crystal system                                                                       | hexagonal                                                       | triclinic                                                       | hexagonal                                                       |
| Space group                                                                          | <i>P</i> 6 <sub>1</sub>                                         | <i>P</i> $\bar{1}$                                              | <i>P</i> 6 <sub>5</sub>                                         |
| Temperature(K)                                                                       | 300.15                                                          | 300.0                                                           | 300.0                                                           |
| <i>a</i> (Å)                                                                         | 12.3790(7)                                                      | 12.4689(18)                                                     | 12.3509(2)                                                      |
| <i>b</i> (Å)                                                                         | 12.3790(7)                                                      | 12.5848(17)                                                     | 12.3509(2)                                                      |
| <i>c</i> (Å)                                                                         | 51.501(4)                                                       | 15.1880(18)                                                     | 51.4803(16)                                                     |
| $\alpha$ (°)                                                                         | 90                                                              | 104.710(4)                                                      | 90                                                              |
| $\beta$ (°)                                                                          | 90                                                              | 90.508(4)                                                       | 90                                                              |
| $\gamma$ (°)                                                                         | 120                                                             | 116.886(4)                                                      | 120                                                             |
| <i>V</i> (Å <sup>3</sup> )                                                           | 6834.7(9)                                                       | 2034.7(5)                                                       | 6800.9(3)                                                       |
| <i>Z</i>                                                                             | 6                                                               | 2                                                               | 6                                                               |
| $\mu$ (mm <sup>-1</sup> )                                                            | 1.688                                                           | 1.883                                                           | 1.335                                                           |
| Unique reflections                                                                   | 9181                                                            | 7586                                                            | 7512                                                            |
| Observed reflections                                                                 | 59205                                                           | 32561                                                           | 23392                                                           |
| <i>R</i> <sub>int</sub>                                                              | 0.0356                                                          | 0.0266                                                          | 0.0504                                                          |
| <i>R</i> <sub>1</sub> , <i>wR</i> <sub>2</sub> [ <i>I</i> > 2 $\sigma$ ( <i>I</i> )] | <i>R</i> <sub>1</sub> = 0.0207, <i>wR</i> <sub>2</sub> = 0.0436 | <i>R</i> <sub>1</sub> = 0.0209, <i>wR</i> <sub>2</sub> = 0.0496 | <i>R</i> <sub>1</sub> = 0.0519, <i>wR</i> <sub>2</sub> = 0.1294 |
| <i>R</i> <sub>1</sub> , <i>wR</i> <sub>2</sub> (all data)                            | <i>R</i> <sub>1</sub> = 0.0234, <i>wR</i> <sub>2</sub> = 0.0445 | <i>R</i> <sub>1</sub> = 0.0240, <i>wR</i> <sub>2</sub> = 0.0512 | <i>R</i> <sub>1</sub> = 0.0700, <i>wR</i> <sub>2</sub> = 0.1379 |

**Table S2.** Selected bond lengths (Å) and bond angles (°) for **1-3**.

| Complex 1                    |            |                              |            |
|------------------------------|------------|------------------------------|------------|
| Dy(1)-O(1)                   | 2.335(3)   | O(3)-Dy(1)-N(1)              | 135.53(11) |
| Dy(1)-O(2)                   | 2.316(3)   | O(3)-Dy(1)-N(2)              | 79.60(10)  |
| Dy(1)-O(3)                   | 2.324(3)   | O(4)-Dy(1)-O(1)              | 141.45(10) |
| Dy(1)-O(4)                   | 2.333(3)   | O(4)-Dy(1)-N(1)              | 76.85(11)  |
| Dy(1)-O(5)                   | 2.307(3)   | O(4)-Dy(1)-N(2)              | 75.31(10)  |
| Dy(1)-O(6)                   | 2.321(3)   | O(5)-Dy(1)-O(1)              | 79.70(9)   |
| Dy(1)-N(1)                   | 2.563(3)   | O(5)-Dy(1)-O(2)              | 80.40(10)  |
| Dy(1)-N(2)                   | 2.575(3)   | O(5)-Dy(1)-O(3)              | 80.38(10)  |
| O(1)-Dy(1)-N(1)              | 116.64(11) | O(5)-Dy(1)-O(4)              | 112.77(11) |
| O(1)-Dy(1)-N(2)              | 80.02(10)  | O(5)-Dy(1)-O(6)              | 72.67(10)  |
| O(2)-Dy(1)-O(1)              | 72.77(10)  | O(5)-Dy(1)-N(1)              | 141.86(11) |
| O(2)-Dy(1)-O(3)              | 145.03(10) | O(5)-Dy(1)-N(2)              | 154.48(10) |
| O(2)-Dy(1)-O(4)              | 143.25(11) | O(6)-Dy(1)-O(1)              | 144.56(10) |
| O(2)-Dy(1)-O(6)              | 80.99(11)  | O(6)-Dy(1)-O(3)              | 120.12(11) |
| O(2)-Dy(1)-N(1)              | 73.21(11)  | O(6)-Dy(1)-O(4)              | 71.58(11)  |
| O(2)-Dy(1)-N(2)              | 108.00(10) | O(6)-Dy(1)-N(1)              | 76.36(11)  |
| O(3)-Dy(1)-O(1)              | 75.23(10)  | O(6)-Dy(1)-N(2)              | 131.71(10) |
| O(3)-Dy(1)-O(4)              | 71.55(10)  | N(1)-Dy(1)-N(2)              | 62.44(11)  |
| Complex 2                    |            |                              |            |
| Dy(1)-N(1)                   | 2.6199(19) | O(3)-Dy(1)-O(2)              | 77.50(6)   |
| Dy(1)-N(2) <sup>1</sup>      | 2.628(2)   | O(3)-Dy(1)-O(6)              | 146.74(6)  |
| Dy(1)-O(1)                   | 2.3353(17) | O(4)-Dy(1)-N(1)              | 72.18(6)   |
| Dy(1)-O(2)                   | 2.3155(16) | O(4)-Dy(1)-N(2) <sup>1</sup> | 103.19(7)  |
| Dy(1)-O(3)                   | 2.3149(17) | O(4)-Dy(1)-O(1)              | 137.53(6)  |
| Dy(1)-O(4)                   | 2.3060(17) | O(4)-Dy(1)-O(2)              | 149.62(6)  |
| Dy(1)-O(5)                   | 2.2764(15) | O(4)-Dy(1)-O(3)              | 73.47(6)   |
| Dy(1)-O(6)                   | 2.3225(17) | O(4)-Dy(1)-O(6)              | 79.61(7)   |
| N(1)-Dy(1)-N(2) <sup>1</sup> | 61.46(6)   | O(5)-Dy(1)-N(1)              | 145.62(6)  |
| O(1)-Dy(1)-N(1)              | 69.84(6)   | O(5)-Dy(1)-N(2) <sup>1</sup> | 151.03(6)  |
| O(1)-Dy(1)-N(2) <sup>1</sup> | 74.45(7)   | O(5)-Dy(1)-O(1)              | 118.64(7)  |
| O(2)-Dy(1)-N(1)              | 128.20(6)  | O(5)-Dy(1)-O(2)              | 84.11(6)   |
| O(2)-Dy(1)-N(2) <sup>1</sup> | 75.43(6)   | O(5)-Dy(1)-O(3)              | 84.20(6)   |
| O(2)-Dy(1)-O(1)              | 72.14 (6)  | O(5)-Dy(1)-O(4)              | 84.27(6)   |
| O(2)-Dy(1)-O(6)              | 123.41(7)  | O(5)-Dy(1)-O(6)              | 73.89(6)   |
| O(3)-Dy(1)-N(1)              | 111.46(6)  | O(6)-Dy(1)-N(1)              | 77.42(6)   |
| O(3)-Dy(1)-N(2) <sup>1</sup> | 71.62(6)   | O(6)-Dy(1)-N(2) <sup>1</sup> | 134.74(6)  |
| O(3)-Dy(1)-O(1)              | 138.96(6)  | O(6)-Dy(1)-O(1)              | 74.27(6)   |
| <sup>1</sup> 1-X,1-Y,1-Z     |            |                              |            |

| Complex 3      |            |                |            |
|----------------|------------|----------------|------------|
| Y(1)-N(1)      | 2.559(6)   | O(3)-Y(1)-N(2) | 131.93(19) |
| Y(1)-N(2)      | 2.561(6)   | O(3)-Y(1)-O(1) | 120.3(2)   |
| Y(1)-O(1)      | 2.317(5)   | O(3)-Y(1)-O(2) | 71.59(19)  |
| Y(1)-O(2)      | 2.322(6)   | O(3)-Y(1)-O(5) | 80.7(2)    |
| Y(1)-O(3)      | 2.305(5)   | O(3)-Y(1)-O(6) | 144.77(18) |
| Y(1)-O(4)      | 2.297(5)   | O(4)-Y(1)-N(1) | 142.3(2)   |
| Y(1)-O(5)      | 2.306(5)   | O(4)-Y(1)-N(2) | 153.91(19) |
| Y(1)-O(6)      | 2.320(5)   | O(4)-Y(1)-O(1) | 80.31(18)  |
| N(1)-Y(1)-N(2) | 62.6(2)    | O(4)-Y(1)-O(2) | 113.0(2)   |
| O(1)-Y(1)-N(1) | 135.36(19) | O(4)-Y(1)-O(3) | 73.03(19)  |
| O(1)-Y(1)-N(2) | 79.43(19)  | O(4)-Y(1)-N(5) | 80.75(19)  |
| O(1)-Y(1)-O(2) | 71.72(19)  | O(4)-Y(1)-N(6) | 79.80(18)  |
| O(1)-Y(1)-O(6) | 75.30(19)  | O(5)-Y(1)-N(1) | 73.1(2)    |
| O(2)-Y(1)-O(6) | 80.99(11)  | O(5)-Y(1)-N(2) | 107.9(2)   |
| O(2)-Y(1)-N(1) | 76.5(2)    | O(5)-Y(1)-O(1) | 145.33(19) |
| O(2)-Y(1)-N(2) | 75.41(19)  | O(5)-Y(1)-O(2) | 142.8(2)   |
| O(2)-Y(1)-O(6) | 141.44(18) | O(5)-Y(1)-O(6) | 73.02(19)  |
| O(3)-Y(1)-N(1) | 76.2(2)    | O(6)-Y(1)-N(1) | 116.5(2)   |
| O(6)-Y(1)-N(2) | 79.46(18)  |                |            |

**Table S3.** Continuous Shape Measurements (CShMs) for Dy(III) ions in **1** and **2** by SHAPE 2.1.

| Configuration                                           | ABOXIY, <b>1</b> | ABOXIY, <b>2</b> (Dy1) | ABOXIY, <b>2</b> (Dy2) |
|---------------------------------------------------------|------------------|------------------------|------------------------|
| Hexagonal bipyramid ( $D_{6h}$ )                        | 15.947           | 16.517                 | 16.512                 |
| Cube ( $O_h$ )                                          | 9.683            | 10.285                 | 10.276                 |
| Square antiprism ( $D_{4d}$ )                           | <b>0.617</b>     | <b>0.583</b>           | <b>0.584</b>           |
| Triangular dodecahedron ( $D_{2d}$ )                    | 2.406            | 2.087                  | 2.083                  |
| Johnson elongated triangular bipyramid J14 ( $D_{3h}$ ) | 26.273           | 27.209                 | 27.209                 |
| Biaugmented trigonal prism J50 ( $C_{2v}$ )             | 2.741            | 2.543                  | 2.547                  |
| Biaugmented trigonal prism ( $C_{2v}$ )                 | 2.222            | 1.939                  | 1.941                  |
| Snub disphenoid J84 ( $D_{2d}$ )                        | 4.793            | 4.794                  | 4.793                  |
| Triakis tetrahedron ( $T_d$ )                           | 10.492           | 11.002                 | 10.993                 |
| Elongated trigonal bipyramid ( $D_{3h}$ )               | 22.529           | 23.378                 | 23.379                 |

**Table S4.** Relaxation fitting parameters from least-squares fitting of  $\chi(f)$  data under 0 Oe dc field of **2**.

| T(K) | $\chi_r$ | $\chi_s$ | $\alpha$               |
|------|----------|----------|------------------------|
| 7    | 8.580    | 0.533    | 0.145                  |
| 8    | 7.389    | 0.429    | 0.093                  |
| 9    | 6.519    | 0.338    | 0.062                  |
| 10   | 5.853    | 0.272    | 0.042                  |
| 11   | 5.325    | 0.232    | 0.028                  |
| 12   | 4.874    | 0.188    | 0.020                  |
| 13   | 4.504    | 0.166    | 0.014                  |
| 14   | 4.201    | 0.154    | 0.011                  |
| 15   | 3.926    | 0.184    | 0.003                  |
| 16   | 3.692    | 0.172    | 0.005                  |
| 17   | 3.481    | 0.148    | 0.006                  |
| 18   | 3.293    | 0.246    | 0.006                  |
| 19   | 3.118    | 0.293    | $4.74 \times 10^{-15}$ |
| 20   | 2.968    | 0.531    | $4.23 \times 10^{-17}$ |

**Table S5.** Relaxation fitting parameters from least-squares fitting of  $\chi(f)$  data under 0 Oe dc field of **1@Y**.

| T(K) | $\chi_r$ | $\chi_s$ | $\alpha$ |
|------|----------|----------|----------|
| 4    | 2.086    | 0.172    | 0.080    |
| 4.5  | 2.224    | 0.210    | 0.086    |
| 5    | 2.385    | 0.203    | 0.124    |
| 5.5  | 2.594    | 0.239    | 0.145    |
| 6    | 2.814    | 0.274    | 0.170    |
| 6.5  | 3.097    | 0.301    | 0.219    |
| 7    | 3.435    | 0.335    | 0.263    |
| 7.5  | 3.873    | 0.306    | 0.346    |
| 8    | 4.617    | 0.345    | 0.428    |

**Table S6.** Calculated energy levels ( $\text{cm}^{-1}$ ) and  $g$  ( $g_x, g_y, g_z$ ) tensors and  $\tau_{\text{QTM}}$  ( $^{-1}/\text{s}$ ) of the lowest eight Kramers doublets (KDs) of **1**, **2a** and **2b** using CASSCF/RASSI-SO with OpenMolcas.

| KDs       | $E/\text{cm}^{-1}$ | $g_x$    | $g_y$  | $g_z$  | $g_z \text{ Angle}/^\circ$ | $\tau_{\text{QTM}}^{-1}/\text{s}$ |                         |
|-----------|--------------------|----------|--------|--------|----------------------------|-----------------------------------|-------------------------|
| <b>1</b>  | ground             | 0.000    | 1.5015 | 6.0670 | 13.9234                    | --                                | $1.396 \times 10^{-9}$  |
|           | 1st                | 345.910  | 3.6047 | 4.1533 | 4.9253                     | 90.40                             | $8.720 \times 10^{-10}$ |
|           | 2nd                | 1054.872 | 0.2795 | 0.2997 | 8.4109                     | 90.04                             | $1.791 \times 10^{-7}$  |
|           | 3rd                | 2369.779 | 0.0097 | 0.0190 | 10.9284                    | 90.32                             | $8.579 \times 10^{-5}$  |
|           | 4th                | 3537.194 | 8.7755 | 7.4733 | 1.6388                     | 90.07                             | $3.130 \times 10^{-10}$ |
|           | 5th                | 3702.952 | 0.2193 | 0.4772 | 12.1302                    | 91.70                             | $1.573 \times 10^{-7}$  |
|           | 6th                | 3752.888 | 0.2334 | 1.3301 | 5.4133                     | 87.67                             | $1.093 \times 10^{-8}$  |
|           | 7th                | 4166.751 | 0.8705 | 0.8984 | 7.5768                     | --                                | $1.753 \times 10^{-8}$  |
| <b>2a</b> | ground             | 0.000    | 0.0098 | 0.0109 | 19.4226                    | --                                | $3.229 \times 10^{-4}$  |
|           | 1st                | 151.469  | 0.3914 | 0.6505 | 15.7314                    | 166.77                            | $9.762 \times 10^{-8}$  |
|           | 2nd                | 233.666  | 1.0442 | 1.6776 | 12.4596                    | 158.09                            | $1.154 \times 10^{-8}$  |
|           | 3rd                | 282.180  | 9.0121 | 6.6287 | 3.7047                     | 65.98                             | $3.364 \times 10^{-10}$ |
|           | 4th                | 327.249  | 1.1516 | 4.2735 | 8.5987                     | 98.45                             | $1.764 \times 10^{-9}$  |
|           | 5th                | 350.751  | 1.7941 | 5.2685 | 14.5189                    | 72.98                             | $1.793 \times 10^{-9}$  |
|           | 6th                | 506.816  | 0.0187 | 0.0234 | 16.1930                    | 61.31                             | $6.447 \times 10^{-5}$  |
|           | 7th                | 594.822  | 0.0007 | 0.0130 | 18.3468                    | 62.09                             | $3.867 \times 10^{-4}$  |
| <b>2b</b> | ground             | 0.000    | 0.0097 | 0.0108 | 19.4237                    | --                                | $3.293 \times 10^{-4}$  |
|           | 1st                | 151.513  | 0.3906 | 0.6491 | 15.7339                    | 166.77                            | $9.805 \times 10^{-8}$  |
|           | 2nd                | 233.719  | 1.0457 | 1.6796 | 12.4626                    | 149.76                            | $1.152 \times 10^{-8}$  |
|           | 3rd                | 282.248  | 9.0119 | 6.6316 | 3.7042                     | 73.91                             | $3.363 \times 10^{-10}$ |
|           | 4th                | 327.277  | 1.1352 | 4.2810 | 8.5976                     | 103.17                            | $1.761 \times 10^{-9}$  |
|           | 5th                | 350.779  | 1.7901 | 5.2470 | 14.5410                    | 109.10                            | $1.809 \times 10^{-9}$  |
|           | 6th                | 506.757  | 0.0189 | 0.0236 | 16.1917                    | 68.76                             | $6.327 \times 10^{-5}$  |
|           | 7th                | 594.729  | 0.0007 | 0.0130 | 18.3454                    | 68.37                             | $3.867 \times 10^{-4}$  |

**Table S7.** Wave functions with definite projection of the total moment  $|m_j\rangle$  for the lowest eight KDs of **1**, **2a** and



**2b** using CASSCF/RASSI-SO with OpenMolcas.

| $E/\text{cm}^{-1}$ | wave functions                                                                                                                                                                                        |
|--------------------|-------------------------------------------------------------------------------------------------------------------------------------------------------------------------------------------------------|
| 0.000              | 64.9% $ \pm 15/2\rangle + 1.8\%  \pm 13/2\rangle + 18.2\%  \pm 9/2\rangle + 1.4\%  \pm 7/2\rangle + 4.3\%  \pm 5/2\rangle + 8.5\%  \pm 1/2\rangle$                                                    |
| 345.910            | 16.8% $ \pm 15/2\rangle + 31.5\%  \pm 13/2\rangle + 5.6\%  \pm 11/2\rangle + 1.7\%  \pm 7/2\rangle + 29.0\%  \pm 5/2\rangle + 1.2\%  \pm 3/2\rangle + 13.3\%  \pm 1/2\rangle$                         |
| 1054.872           | 10.7% $ \pm 15/2\rangle + 30.5\%  \pm 13/2\rangle + 3.9\%  \pm 11/2\rangle + 24.8\%  \pm 9/2\rangle + 1.4\%  \pm 7/2\rangle + 5.3\%  \pm 3/2\rangle + 23.2\%  \pm 1/2\rangle$                         |
| 2369.779           | 3.5% $ \pm 15/2\rangle + 18.2\%  \pm 13/2\rangle + 1.3\%  \pm 11/2\rangle + 39.2\%  \pm 9/2\rangle + 32.1\%  \pm 5/2\rangle + 5.3\%  \pm 1/2\rangle$                                                  |
| <b>1</b>           |                                                                                                                                                                                                       |
| 3537.194           | 2.7% $ \pm 13/2\rangle + 50.9\%  \pm 11/2\rangle + 12.8\%  \pm 7/2\rangle + 31.4\%  \pm 3/2\rangle$                                                                                                   |
| 3702.952           | 3.9% $ \pm 13/2\rangle + 4.6\%  \pm 11/2\rangle + 13.8\%  \pm 9/2\rangle + 6.0\%  \pm 7/2\rangle + 28.9\%  \pm 5/2\rangle + 3.8\%  \pm 3/2\rangle + 38.3\%  \pm 1/2\rangle$                           |
| 3752.888           | 1.5% $ \pm 15/2\rangle + 5.9\%  \pm 13/2\rangle + 27.0\%  \pm 11/2\rangle + 1.6\%  \pm 9/2\rangle + 45.0\%  \pm 7/2\rangle + 4.7\%  \pm 5/2\rangle + 6.6\%  \pm 3/2\rangle + 7.7\%  \pm 1/2\rangle$   |
| 4166.751           | 1.4% $ \pm 15/2\rangle + 5.7\%  \pm 13/2\rangle + 6.3\%  \pm 11/2\rangle + 1.0\%  \pm 9/2\rangle + 31.5\%  \pm 7/2\rangle + 51.3\%  \pm 3/2\rangle + 2.5\%  \pm 1/2\rangle$                           |
| 0.000              | 92.6% $ \pm 15/2\rangle + 5.9\%  \pm 11/2\rangle$                                                                                                                                                     |
| 151.469            | 72.7% $ \pm 13/2\rangle + 1.5\%  \pm 11/2\rangle + 16.6\%  \pm 9/2\rangle + 4.3\%  \pm 7/2\rangle + 3.0\%  \pm 5/2\rangle + 1.4\%  \pm 3/2\rangle$                                                    |
| 233.666            | 4.0% $ \pm 15/2\rangle + 9.7\%  \pm 13/2\rangle + 36.2\%  \pm 11/2\rangle + 4.3\%  \pm 9/2\rangle + 18.9\%  \pm 7/2\rangle + 8.8\%  \pm 5/2\rangle + 10.5\%  \pm 3/2\rangle + 7.6\%  \pm 1/2\rangle$  |
| 282.180            | 2.1% $ \pm 13/2\rangle + 24.9\%  \pm 11/2\rangle + 16.9\%  \pm 9/2\rangle + 2.4\%  \pm 7/2\rangle + 11.4\%  \pm 5/2\rangle + 11.9\%  \pm 3/2\rangle + 29.7\%  \pm 1/2\rangle$                         |
| <b>2a</b>          |                                                                                                                                                                                                       |
| 327.249            | 4.8% $ \pm 13/2\rangle + 5.2\%  \pm 11/2\rangle + 24.3\%  \pm 9/2\rangle + 27.2\%  \pm 7/2\rangle + 4.7\%  \pm 5/2\rangle + 19.3\%  \pm 3/2\rangle + 14.2\%  \pm 1/2\rangle$                          |
| 350.751            | 1.2% $ \pm 13/2\rangle + 3.2\%  \pm 11/2\rangle + 4.8\%  \pm 9/2\rangle + 18.0\%  \pm 7/2\rangle + 46.4\%  \pm 5/2\rangle + 21.7\%  \pm 3/2\rangle + 4.4\%  \pm 1/2\rangle$                           |
| 506.816            | 1.3% $ \pm 15/2\rangle + 6.2\%  \pm 13/2\rangle + 15.4\%  \pm 11/2\rangle + 18.3\%  \pm 9/2\rangle + 7.6\%  \pm 7/2\rangle + 3.6\%  \pm 5/2\rangle + 17.9\%  \pm 3/2\rangle + 29.9\%  \pm 1/2\rangle$ |
| 594.822            | 3.2% $ \pm 13/2\rangle + 7.7\%  \pm 11/2\rangle + 14.1\%  \pm 9/2\rangle + 21.1\%  \pm 7/2\rangle + 22.2\%  \pm 5/2\rangle + 17.2\%  \pm 3/2\rangle + 13.9\%  \pm 1/2\rangle$                         |
| 0.000              | 92.6% $ \pm 15/2\rangle + 5.9\%  \pm 11/2\rangle$                                                                                                                                                     |
| 151.513            | 72.7% $ \pm 13/2\rangle + 1.5\%  \pm 11/2\rangle + 16.5\%  \pm 9/2\rangle + 4.4\%  \pm 7/2\rangle + 3.0\%  \pm 5/2\rangle + 1.4\%  \pm 3/2\rangle$                                                    |
| 233.719            | 4.1% $ \pm 15/2\rangle + 9.7\%  \pm 13/2\rangle + 36.2\%  \pm 11/2\rangle + 4.2\%  \pm 9/2\rangle + 18.9\%  \pm 7/2\rangle + 8.7\%  \pm 5/2\rangle + 10.4\%  \pm 3/2\rangle + 7.6\%  \pm 1/2\rangle$  |
| 282.248            | 2.1% $ \pm 13/2\rangle + 25.0\%  \pm 11/2\rangle + 16.9\%  \pm 9/2\rangle + 2.4\%  \pm 7/2\rangle + 11.3\%  \pm 5/2\rangle + 11.9\%  \pm 3/2\rangle + 29.6\%  \pm 1/2\rangle$                         |
| <b>2b</b>          |                                                                                                                                                                                                       |
| 327.277            | 4.8% $ \pm 13/2\rangle + 5.2\%  \pm 11/2\rangle + 24.3\%  \pm 9/2\rangle + 27.1\%  \pm 7/2\rangle + 4.7\%  \pm 5/2\rangle + 19.4\%  \pm 3/2\rangle + 14.2\%  \pm 1/2\rangle$                          |
| 350.779            | 1.1% $ \pm 13/2\rangle + 3.1\%  \pm 11/2\rangle + 4.9\%  \pm 9/2\rangle + 18.1\%  \pm 7/2\rangle + 46.3\%  \pm 5/2\rangle + 21.7\%  \pm 3/2\rangle + 4.4\%  \pm 1/2\rangle$                           |
| 506.757            | 1.1% $ \pm 15/2\rangle + 6.2\%  \pm 13/2\rangle + 15.4\%  \pm 11/2\rangle + 18.3\%  \pm 9/2\rangle + 7.6\%  \pm 7/2\rangle + 3.6\%  \pm 5/2\rangle + 17.9\%  \pm 3/2\rangle + 29.8\%  \pm 1/2\rangle$ |
| 594.729            | 3.2% $ \pm 13/2\rangle + 7.7\%  \pm 11/2\rangle + 14.1\%  \pm 9/2\rangle + 21.2\%  \pm 7/2\rangle + 22.2\%  \pm 5/2\rangle + 17.2\%  \pm 3/2\rangle + 13.9\%  \pm 1/2\rangle$                         |

**Table S8.** Mulliken atomic charge on the metal atoms and donor atoms in the ground state of complexes **1**, **2a** and

**2b** calculated within CASSCF.

|    | <b>1</b> |     | <b>2a</b> |     | <b>2b</b> |
|----|----------|-----|-----------|-----|-----------|
| Dy | 1.7629   | Dy1 | 1.7629    | Dy2 | 1.7600    |
| O1 | -0.6048  | O1  | -0.5818   | O1' | -0.5808   |
| O2 | -0.6023  | O2  | -0.6015   | O2' | -0.6013   |
| O3 | -0.5876  | O3  | -0.6267   | O3' | -0.6264   |
| O4 | -0.5786  | O4  | -0.6179   | O4' | -0.6186   |
| O5 | -0.5945  | O5  | -0.6037   | O5' | -0.6027   |
| O6 | -0.5699  | O6  | -0.5960   | O6' | -0.5959   |
| N1 | -0.5194  | N1  | -0.5785   | N1' | -0.5369   |
| N2 | -0.5374  | N2  | -0.5635   | N2' | -0.5632   |

**Table S9.** Calculated crystal field parameters  $B(k, q)$  for **1**, **2a** and **2b** using SCF/RASSI-SO with OpenMolcas.

| k | q  | $B_k^q$                |                        |                        |
|---|----|------------------------|------------------------|------------------------|
|   |    | <b>1</b>               | <b>2a</b>              | <b>2b</b>              |
| 2 | -2 | $-3.30 \times 10^{-1}$ | -2.05                  | 1.14                   |
| 2 | -1 | 9.14                   | 2.99                   | 9.00                   |
| 2 | 0  | -12.61                 | -2.02                  | -4.48                  |
| 2 | 1  | -8.07                  | -1.25                  | 4.28                   |
| 2 | 2  | -1.31                  | $-8.92 \times 10^{-1}$ | -5.19                  |
| 4 | -4 | $5.70 \times 10^{-2}$  | $-1.50 \times 10^{-2}$ | $1.01 \times 10^{-1}$  |
| 4 | -3 | $-9.22 \times 10^{-2}$ | $-5.26 \times 10^{-2}$ | $4.66 \times 10^{-2}$  |
| 4 | -2 | $6.42 \times 10^{-3}$  | $2.26 \times 10^{-3}$  | $1.92 \times 10^{-1}$  |
| 4 | -1 | $4.06 \times 10^{-2}$  | $-2.12 \times 10^{-3}$ | $-2.76 \times 10^{-3}$ |
| 4 | 0  | $-3.92 \times 10^{-2}$ | $-3.93 \times 10^{-3}$ | $-2.25 \times 10^{-2}$ |
| 4 | 1  | $-1.18 \times 10^{-1}$ | $1.50 \times 10^{-2}$  | $1.25 \times 10^{-1}$  |
| 4 | 2  | $2.00 \times 10^{-2}$  | $-2.79 \times 10^{-2}$ | $-3.24 \times 10^{-2}$ |
| 4 | 3  | $-2.06 \times 10^{-1}$ | $1.36 \times 10^{-2}$  | $-2.64 \times 10^{-1}$ |
| 4 | 4  | $4.86 \times 10^{-2}$  | $-2.81 \times 10^{-3}$ | $9.01 \times 10^{-3}$  |
| 6 | -6 | $2.76 \times 10^{-5}$  | $2.83 \times 10^{-5}$  | $-4.87 \times 10^{-3}$ |
| 6 | -5 | $-2.55 \times 10^{-3}$ | $-2.00 \times 10^{-5}$ | $-3.44 \times 10^{-5}$ |
| 6 | -4 | $1.75 \times 10^{-3}$  | $3.67 \times 10^{-5}$  | $-2.54 \times 10^{-3}$ |
| 6 | -3 | $-1.57 \times 10^{-3}$ | $-2.44 \times 10^{-4}$ | $7.11 \times 10^{-3}$  |
| 6 | -2 | $-1.47 \times 10^{-5}$ | $-1.29 \times 10^{-4}$ | $1.01 \times 10^{-4}$  |
| 6 | -1 | $-7.97 \times 10^{-4}$ | $-1.36 \times 10^{-4}$ | $-9.41 \times 10^{-4}$ |
| 6 | 0  | $-4.05 \times 10^{-5}$ | $-6.99 \times 10^{-6}$ | $-3.36 \times 10^{-4}$ |
| 6 | 1  | $1.84 \times 10^{-3}$  | $-5.35 \times 10^{-5}$ | $-3.13 \times 10^{-3}$ |
| 6 | 2  | $-2.61 \times 10^{-4}$ | $5.93 \times 10^{-5}$  | $-2.42 \times 10^{-3}$ |
| 6 | 3  | $4.67 \times 10^{-3}$  | $-1.55 \times 10^{-4}$ | $-3.02 \times 10^{-3}$ |
| 6 | 4  | $-2.17 \times 10^{-3}$ | $1.47 \times 10^{-4}$  | $-2.42 \times 10^{-3}$ |
| 6 | 5  | $3.18 \times 10^{-3}$  | $-8.17 \times 10^{-5}$ | $3.84 \times 10^{-3}$  |
| 6 | 6  | $5.10 \times 10^{-4}$  | $-1.98 \times 10^{-4}$ | $7.85 \times 10^{-4}$  |

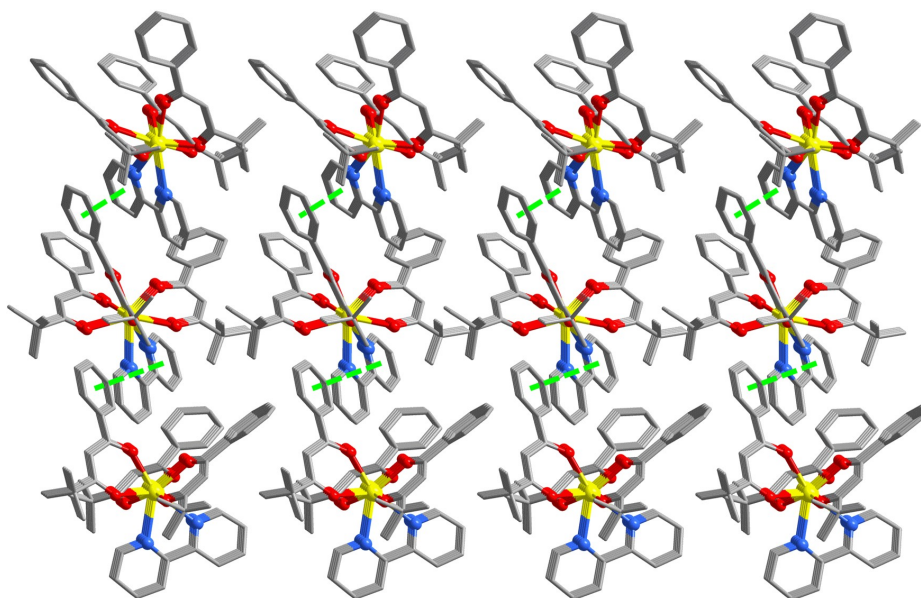

**Fig. S1** Crystal packing diagram for complex **1**, the dashed line represents the interaction.

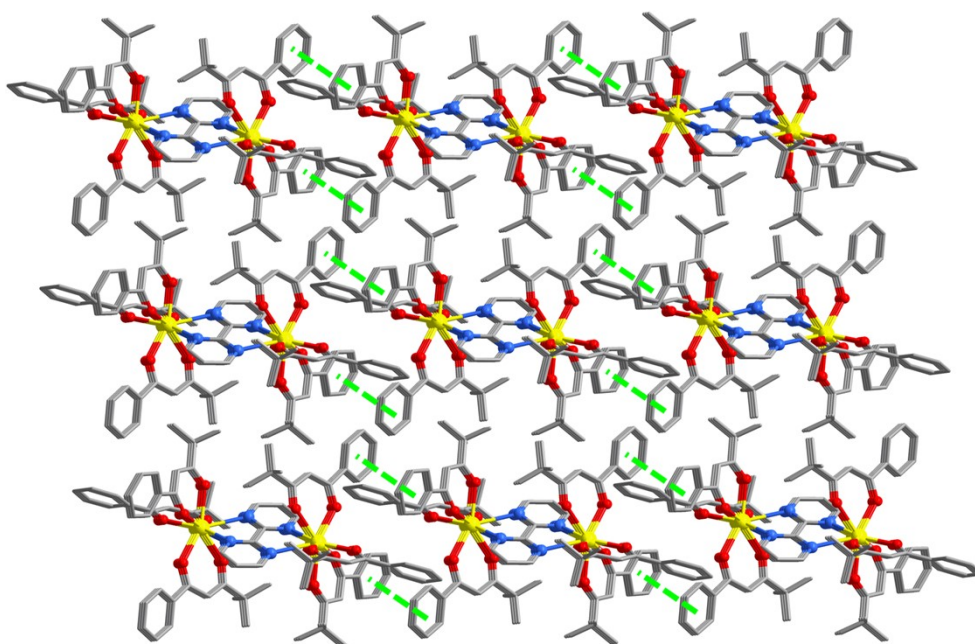

**Fig. S2** Crystal packing diagram for complex **2**, the dashed line represents the interaction.

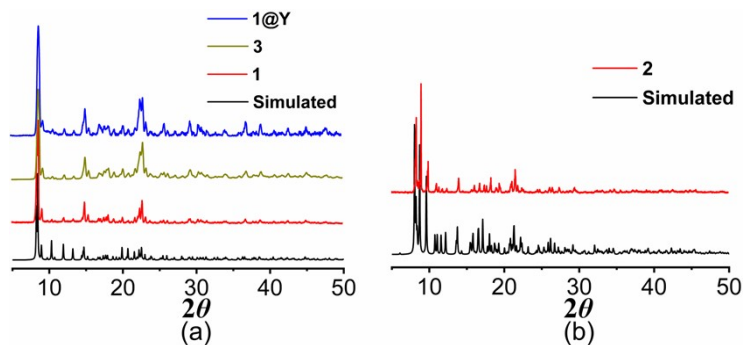

Fig. S3 PXRD curves of **1**, **3**, **1@Y** (a) and **2** (b).

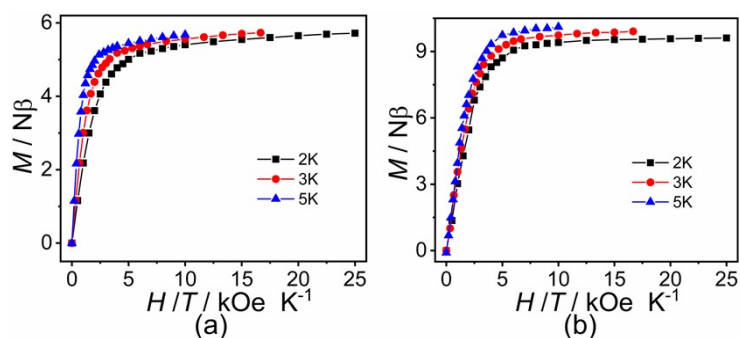

Fig. S4 Plots of  $M$  vs  $H/T$  for **1** (a) and **2** (b) at different temperatures.

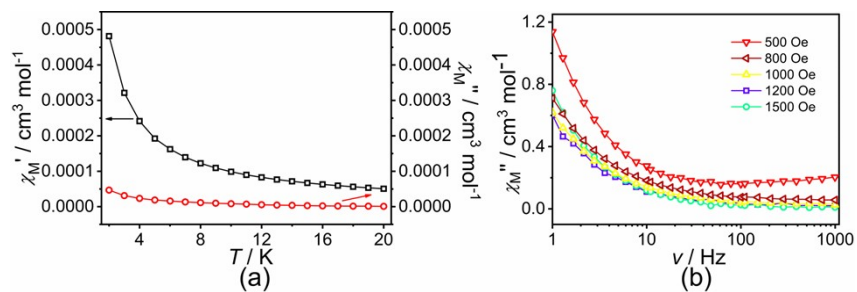

Fig. S5 Ac magnetic susceptibility measurements for **1** (a) in zero static field. Frequency dependence of  $\chi''_M$  susceptibilities for **1** (b) under different dc fields.

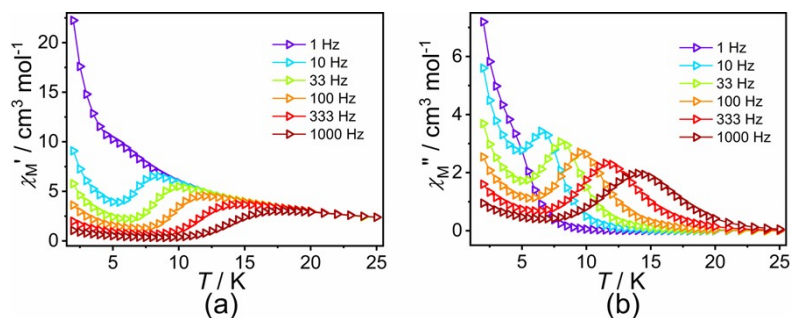

Fig. S6 Temperature dependence of the  $\chi'_M$  (a) and  $\chi''_M$  (b) ac susceptibilities for complex **2** at different frequencies under zero static field.

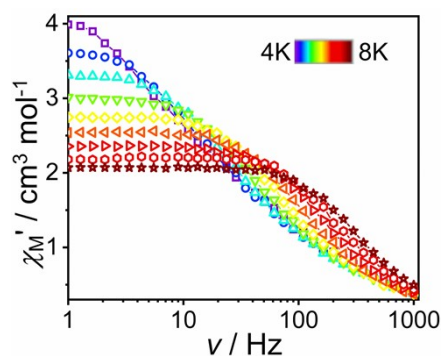

**Fig. S7** Frequency dependence of the  $\chi_M'$  ac susceptibilities for **1@Y** under zero static field.

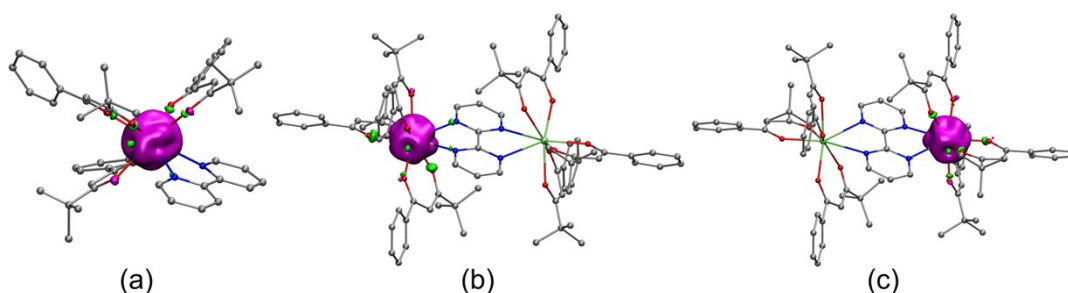

**Fig. S8** Mulliken spin density of complexes **1** (a), **2a** (b) and **2b** (c) (magenta for  $\alpha$  spin, green for  $\beta$  spin, isovalue = 0.02).

#### References:

1. I. Fdez. Galván, M. Vacher, A. Alavi, C. Angeli, F. Aquilante, J. Autschbach, J. J. Bao, S. I. Bokarev, N. A. Bogdanov, R. K. Carlson, L. F. Chibotaru, J. Creutzberg, N. Dattani, M. G. Delcey, S. S. Dong, A. Dreuw, L. Freitag, L. M. Frutos, L. Gagliardi, F. Gendron, A. Giussani, L. González, G. Grell, M. Guo, C. E. Hoyer, M. Johansson, S. Keller, S. Knecht, G. Kovačević, E. Källman, G. Li Manni, M. Lundberg, Y. Ma, S. Mai, J. P. Malhado, P. Å. Malmqvist, P. Marquetand, S. A. Mewes, J. Norell, M. Olivucci, M. Oppel, Q. M. Phung, K. Pierloot, F. Plasser, M. Reiher, A. M. Sand, I. Schapiro, P. Sharma, C. J. Stein, L. K. Sørensen, D. G. Truhlar, M. Ugandi, L. Ungur, A. Valentini, S. Vancóillie, V. Veryazov, O. Weser, T. A. Wesółowski, P.-O. Widmark, S. Wouters, A. Zech, J. P. Zobel and R. Lindh, *J. Chem. Theory Comput.*, 2019, **15**, 5925-5964.
2. W. Humphrey, A. Dalke, K. Schulten, VMD: visual molecular dynamics, *J. Mol. Graph.*, 1996, **14**, 33-38.
3. B. O. Roos, R. Lindh, P.-Å. Malmqvist, V. Veryazov, P.-O. Widmark and A. C. Borin, *J. Phys. Chem. A*, 2008, **112**, 11431-11435.
4. B. O. Roos, R. Lindh, P.-Å. Malmqvist, V. Veryazov and P.-O. Widmark, *J. Phys. Chem. A*, 2004, **108**, 2851-2858.
5. S. Grimme, *WIREs Comput. Mol. Sci.*, 2011, **1**, 211-228.
6. F. Neese, F. Wennmohs, U. Becker and C. Riplinger, *J. Chem. Phys.*, 2020, **152**, 224108.
7. F. Neese, *ORCA-an ab initio, density functional and semiempirical Program Package, 5.0.3*, University of Bonn, Bonn, Germany, 2022.
8. A. D. Becke, *Phys. Rev. A*, 1988, **38**, 3098-3100.
9. D. Aravena, F. Neese and D. A. Pantazis, *J. Chem. Theory Comput.*, 2016, **12**, 1148-1156.
10. F. Weigend and R. Ahlrichs, *Phys. Chem. Chem. Phys.*, 2005, **7**, 3297-3305.
11. C. Jin, X.-L. Li, Z. Liu, A. Mansikkamäki and J. Tang, *Dalton Trans.*, 2020, **49**, 10477-10485.
